# Supplementary material for: Ag nanoparticle embedded Cu nanoporous hybrid arrays for the selective electrocatalytic reduction of CO2 towards ethylene
Source: Royal Society of Chemistry journal article supplement (doi:10.1039/d0qi00025f), 2020-01-01
Supplement: d0qi00025f1.pdf [file d0qi00025f1.pdf]

## Supporting Information

# Ag Nanoparticle Embedded Cu Nanoporous Hybrid Arrays for the Selective Electrocatalytic Reduction of CO<sub>2</sub> towards Ethylene

Liang Hou<sup>1 §</sup>, Jianyu Han<sup>2 §</sup>, Chong Wang<sup>1</sup>, Yuwei Zhang<sup>1</sup>, Yuanbin Wang<sup>1</sup>, Zhiming Bai<sup>3\*</sup>, Yousong Gu<sup>1</sup>, Yan Gao<sup>2\*</sup>, Xiaoqin Yan<sup>1\*</sup>

1. School of Materials Science and Engineering, University of Science and Technology Beijing, Beijing 100083, People's Republic of China. E-mail: xqyan@mater.ustb.edu.cn

2. Laboratory of Nanomaterials, National Center for Nanoscience and Technology, Beijing, 100190, People's Republic of China. E-mail: gaoyan@nanoctr.cn

3. School of Civil and Resource Engineering, University of Science and Technology Beijing, Beijing 100083, P. R. China. E-mail: [baizhiming2008@126.com](mailto:baizhiming2008@126.com)

§ These two authors contributed equally.

## Table of Contents

|                                                                                                                                                      |   |
|------------------------------------------------------------------------------------------------------------------------------------------------------|---|
| <b>Fig S1.</b> Optimized structures of Cu surfaces                                                                                                   | 1 |
| <b>Fig S2</b> Optimized structures of Ag/Cu surfaces                                                                                                 | 1 |
| <b>Fig S3</b> TEM analyses of Ag@Cu Np hybrid arrays                                                                                                 | 2 |
| <b>Fig S4</b> TEM analyses of Zn@Cu Np hybrid arrays                                                                                                 | 2 |
| <b>Fig S5</b> Enlarged with the XRD patterns of Ag@Cu Np hybrid arrays                                                                               | 2 |
| <b>Fig S6</b> Representative <sup>1</sup> H NMR (400 MHz, D <sub>2</sub> O, 298K) spectrum of electrocatalytic CO <sub>2</sub> reduction on Ag@Cu Np | 3 |
| <b>Fig S7</b> C <sub>2</sub> H <sub>4</sub> partial current density of all catalysts during CO <sub>2</sub> reduction                                | 3 |

**Fig S8** SEM images of Ag@Cu Np with different Ag content • • • • • 4

**Fig S9** Electrocatalytic performance of Ag@CuNp with different Ag content • • • • • 4

**Fig S10** Long-term stability of Zn@Cu Np and Ag@Cu Np depending on the  
time • • • • 5

**Fig S11** SEM images of Ag@Cu Np after 8 hours of CO<sub>2</sub> reduction • • • • • 5

**Table S1** Recently reported highly active catalysts for CO<sub>2</sub> reduction • • • • • 6

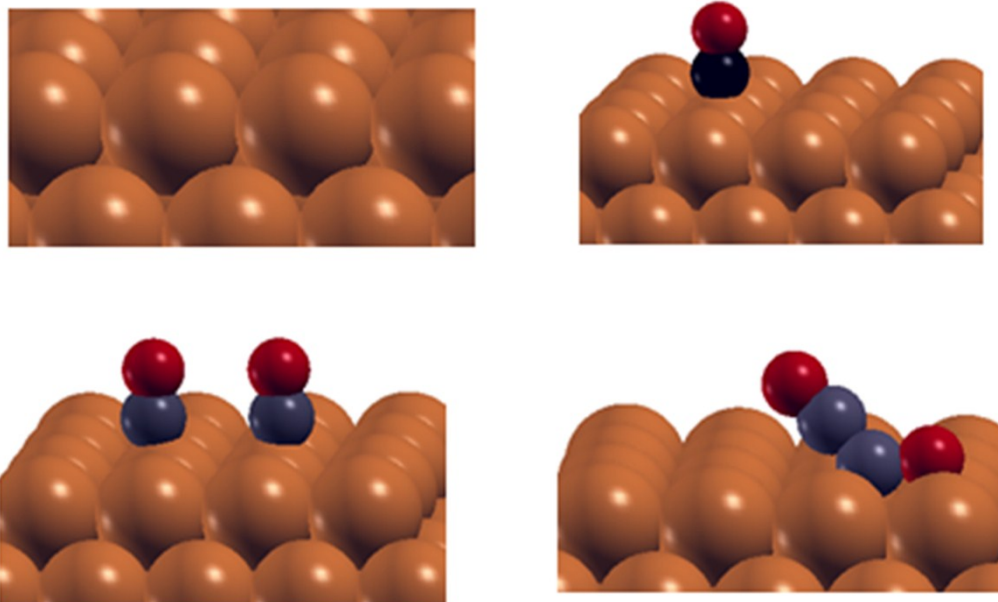

**Fig. S1** The optimized geometries of various Cu surfaces for examining the \*CO adsorption and CO=CO dimerization during CO<sub>2</sub>RR. Filled circles with orange is Cu, brown is C and red is O.

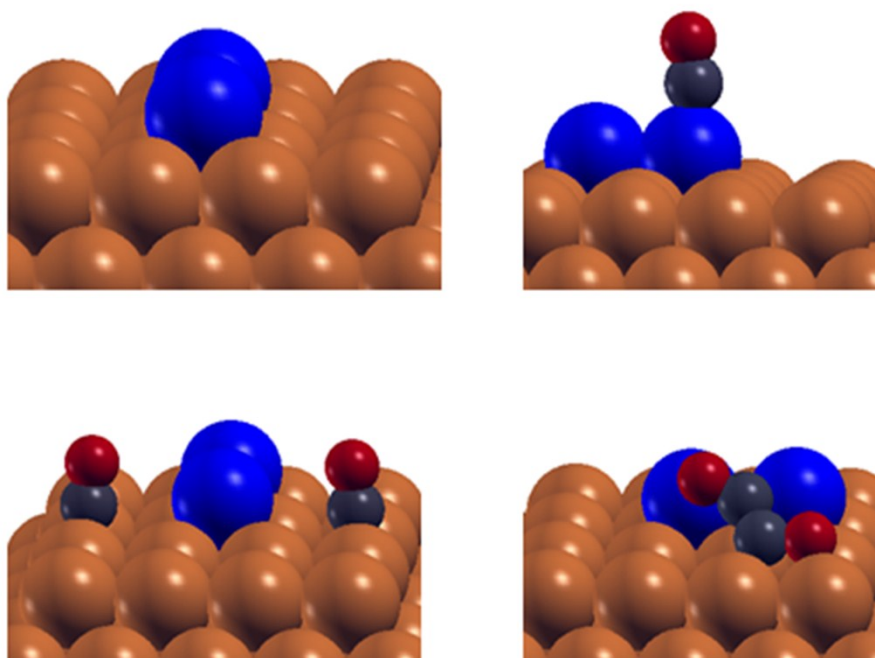

**Fig. S2** The optimized geometries of various Ag/Cu surfaces for examining the \*CO adsorption and CO=CO dimerization during CO<sub>2</sub>RR. Filled circles with orange is Cu, blue is Ag, brown is C and red is O.

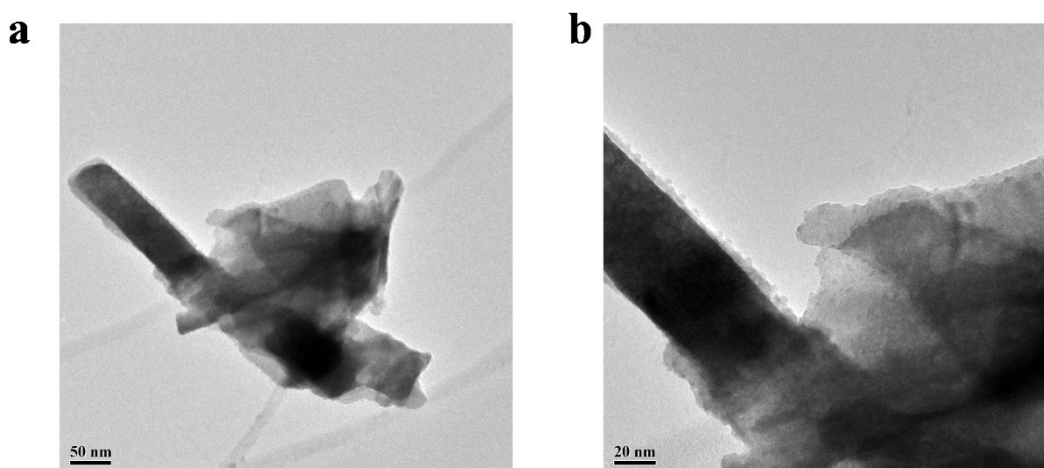

**Fig. S3** TEM characterization of Ag@Cu Np hybrid arrays at different magnifications(a) (b).

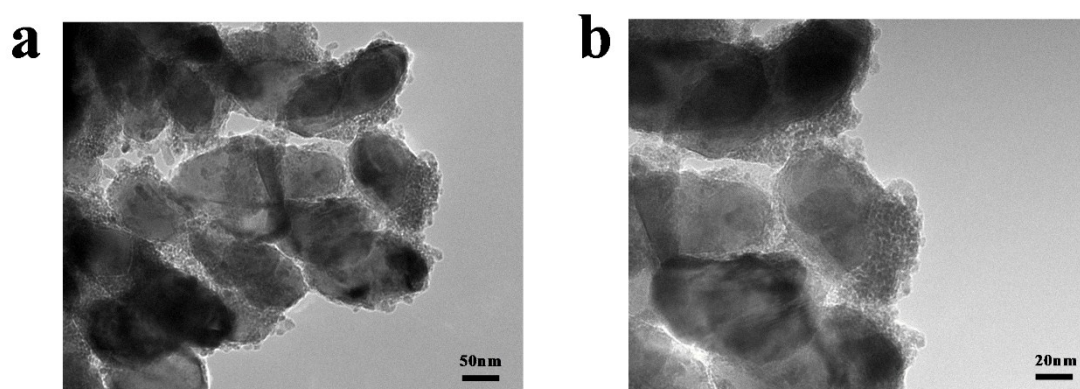

**Fig. S4** TEM characterization of Zn@Cu Np hybrid arrays at different magnifications(a) (b).

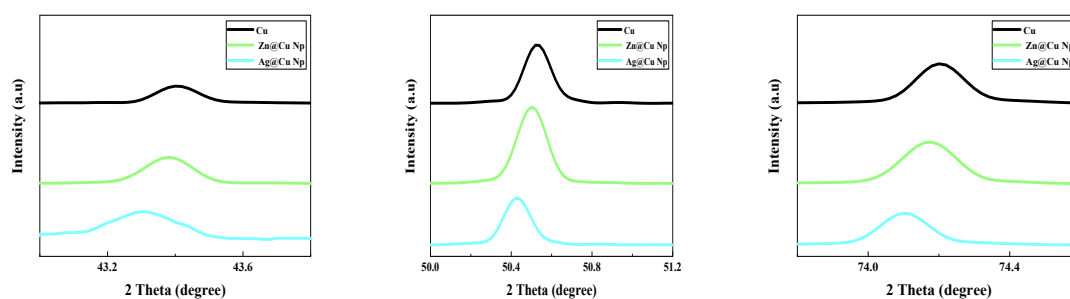

**Fig. S5** Enlarged XRD patterns of Cu, Ag@Cu Np, Zn@Cu Np hybrid arrays in the diffraction peaks of (111), (200), and (220) facet.

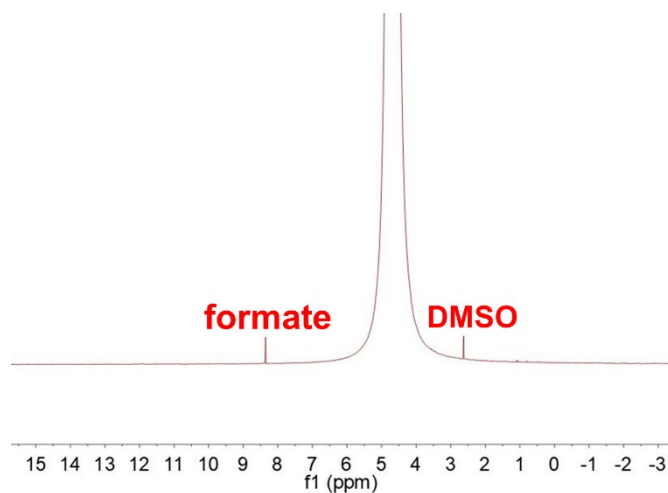

**Fig. S6** Representative  $^1\text{H}$  NMR (400 MHz,  $\text{D}_2\text{O}$ , 298K) of electrocatalytic  $\text{CO}_2$  reduction on Ag@Cu Np at -1.2V vs. RHE in 0.5 M  $\text{KHCO}_3$ . DMSO was used as an internal standard for liquid product quantification.

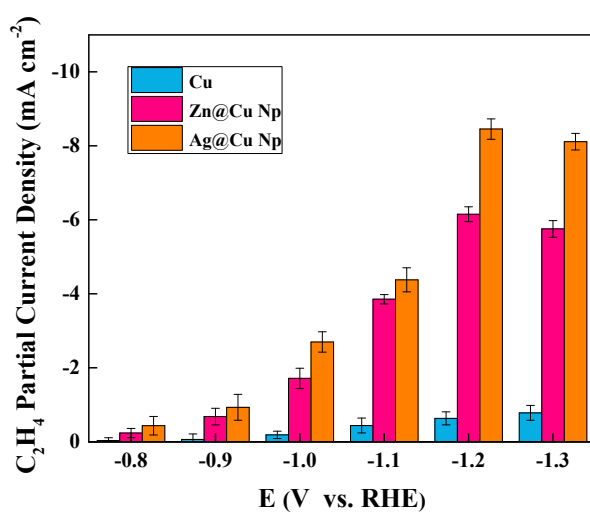

**Fig. S7**  $\text{C}_2\text{H}_4$  partial current density of Ag@Cu Np pre-catalyst (orange), Zn@Cu Np pre-catalyst (dark pink) and Cu pre-catalyst (light blue) in the potential range from -0.8 to -1.2 V (vs. RHE).

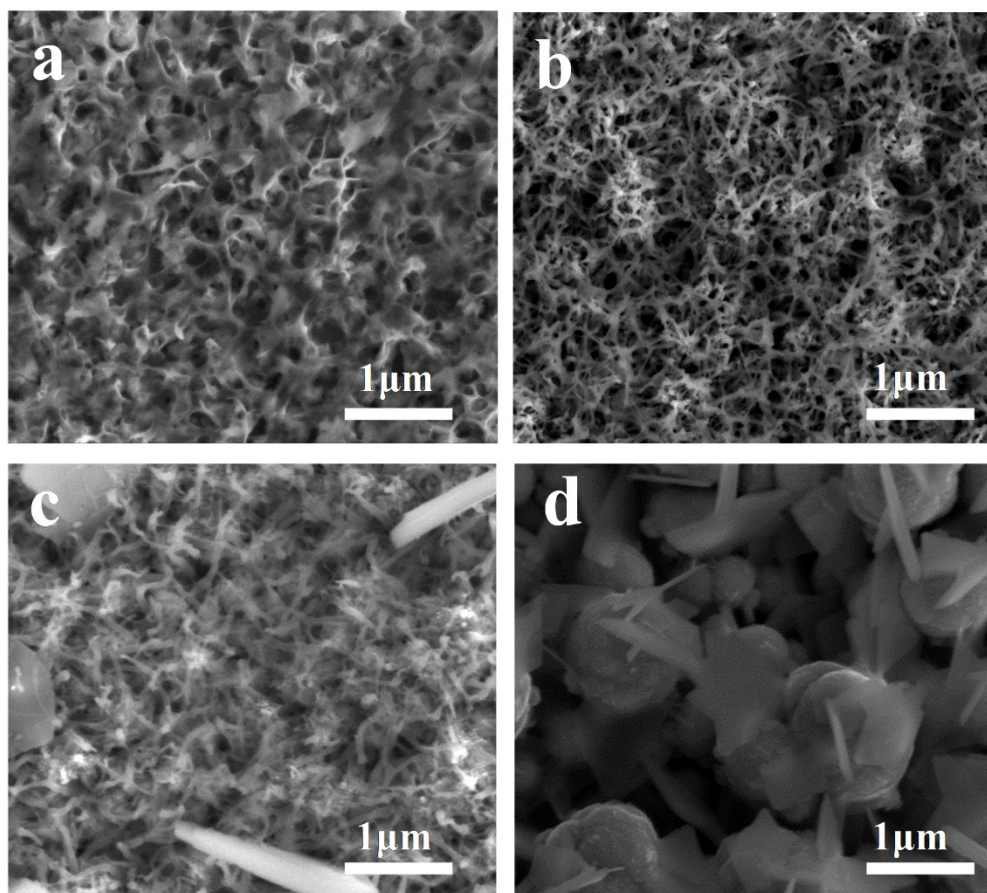

**Fig. S8** SEM images of (a) Cu Np, (b)(c)(d) Ag@Cu Np with different Ag contents (2,5,10mmol), respectively.

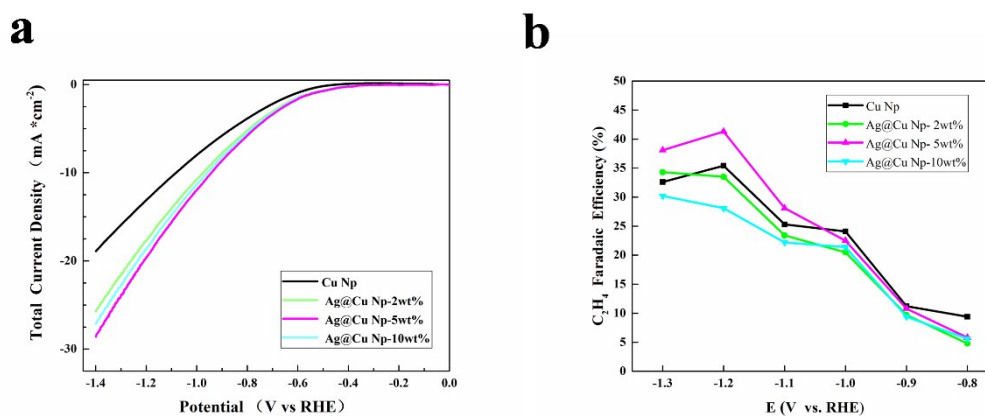

**Fig. S9** Electrocatalytic performance of Ag@CuNp with different Ag contents (wt%). (a) LSV curves of Ag@Cu Np with different Ag contents (0%, 2%, 5%, 10%). (b) Ethylene Faradaic efficiencies of Ag@Cu Np pre-catalyst with different Ag contents (0%, 2%, 5%, 10%) in the potential range from -0.8 to -1.3 V (vs. RHE).



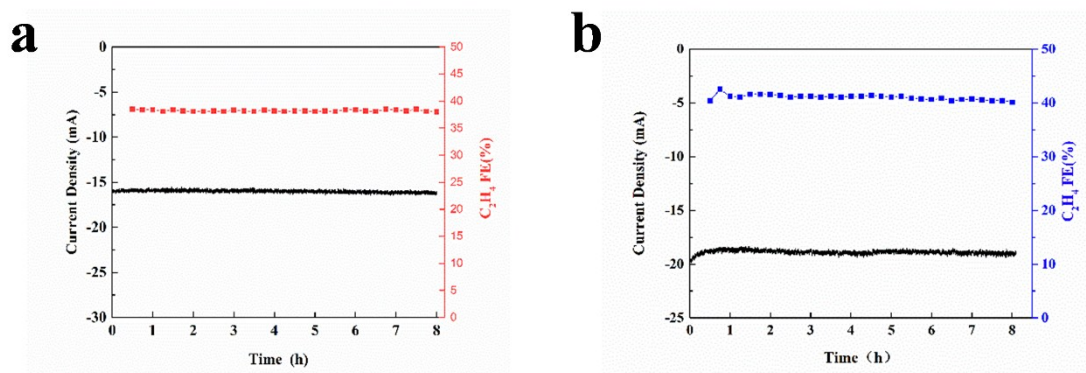

**Fig. S10** Long-term stability of Zn@Cu Np (a) and Ag@Cu Np (b) pre-catalysts at a potential load of -1.2V (vs. RHE) and the corresponding Faradaic efficiency of ethylene.

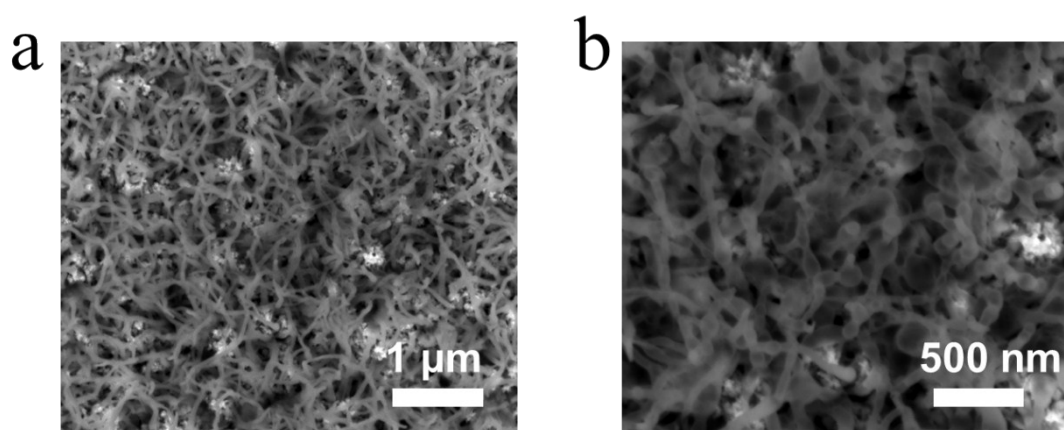

**Fig. S11** SEM images of Ag@Cu Np at different magnifications (a) (b) after electrocatalytic CO<sub>2</sub> reduction.

**Table. S1** Recently reported highly active catalysts for CO<sub>2</sub> reduction in an aqueous solution.

| Catalysts                         | Electrolyte            | Main Product                                                     | Potential | F.E.              | Ref. |
|-----------------------------------|------------------------|------------------------------------------------------------------|-----------|-------------------|------|
| Cu Nanowire Arrays                | 0.1M KHCO <sub>3</sub> | C <sub>2</sub> H <sub>4</sub>                                    | -1.1v     | 17.4%             | S1   |
| Cu Mesoporous                     | 0.1M KHCO <sub>3</sub> | C <sub>2</sub> H <sub>4</sub>                                    | -1.3v     | 38%               | S2   |
| Cu nanocubes                      | 0.1M KHCO <sub>3</sub> | C <sub>2</sub> H <sub>4</sub>                                    | -1.1v     | 41%               | S3   |
| Phase-separated Cu-Pd             | 1 M KOH                | C <sub>2</sub> H <sub>4</sub> , C <sub>2</sub> H <sub>5</sub> OH | —         | Total:<br>63%     | S4   |
| B-doped Cu                        | 0.1M KHCO <sub>3</sub> | C <sub>2</sub> H <sub>4</sub> , C <sub>2</sub> H <sub>5</sub> OH | -1.1v     | 52%and<br>27%     | S5   |
| O <sub>2</sub> -plasma-treated Cu | 0.1M KHCO <sub>3</sub> | C <sub>2</sub> H <sub>4</sub>                                    | -0.9v     | 60%               | S6   |
| Cu <sub>2</sub> O films           | 0.1M KHCO <sub>3</sub> | C <sub>2</sub> H <sub>4</sub> , C <sub>2</sub> H <sub>5</sub> OH | -0.99 v   | 34<br>%and16<br>% | S7   |
| Ag-Cu Nanodimers                  | 0.1M KHCO <sub>3</sub> | C <sub>2</sub> H <sub>4</sub>                                    | -1.1v     | 40%               | S8   |
| oxide-derived Cu <sub>x</sub> Zn  | 0.1M KHCO <sub>3</sub> | C <sub>2</sub> H <sub>5</sub> OH                                 | -1.0v     | 29.1%             | S9   |
| Ag                                | 0.1M KHCO <sub>3</sub> | CO                                                               | -0.5V     | 90%               | S10  |
| Zn                                | 0.1M KHCO <sub>3</sub> | CO                                                               | -0.9v     | 47.55 %           | S11  |

## References

- S1 M. Ma, K. Djanashvili and W. A. Smith, Controllable Hydrocarbon Formation from the Electrochemical Reduction of CO<sub>2</sub> over Cu Nanowire Arrays, *Angew. Chem. Int. Ed.*, 2016, **55**, 6680.
- S2 K. D. Yang, W. R. Ko, J. H. Lee, S. J. Kim, H. Lee, M. H. Lee and K. T. Nam, Morphology-Directed Selective Production of Ethylene or Ethane from CO<sub>2</sub> on a Cu Mesopore Electrode, *Angew. Chem. Int. Ed.*, 2017, **56**, 796.
- S3 A. Loiudice, P. Lobaccaro, E. A. Kamali, T. Thao, B. H. Huang, J. W. Ager and R. Buonsanti, Tailoring Copper Nanocrystals towards C<sub>2</sub> Products in Electrochemical CO<sub>2</sub> Reduction, *Angew. Chem. Int. Ed.*, 2016, **55**, 5789.
- S4 S. Ma, M. Sadakiyo, M. Heima, R. Luo, R. T. Haasch, J. I. Gold, M. Yamauchi and P. J. Kenis, Electroreduction of carbon dioxide to hydrocarbons using bimetallic Cu-Pd catalysts with different mixing patterns, *J. Am. Chem. Soc.*, 2017, **139**, 47.
- S5 Y. Zhou, F. Che, M. Liu, C. Zou, Z. Liang, P. De Luna, H. Yuan, J. Li, Z. Wang, H. Xie, H. Li, P. Chen, E. Bladt, R. Quintero-Bermudez, T. K. Sham, S. Bals, J. Hofkens, D. Sinton, G. Chen and E. H. Sargent, Dopant-induced electron localization drives CO<sub>2</sub> reduction to C<sub>2</sub> hydrocarbons, *Nat. Chem.*, 2018, **10**, 974.
- S6 H. Mistry, A. S. Varela, C. S. Bonifacio, I. Zegkinoglou, I. Sinev, Y. W. Choi, K. Kisslinger, E. A. Stach, J. C. Yang, P. Strasser and B. R. Cuenya, Highly selective



- plasma-activated copper catalysts for carbon dioxide reduction to ethylene, *Nat. Commun.*, 2016, **7**, 12123.
- S7 D. Ren, Y. Deng, A. D. Handoko, C. S. Chen, S. Malkhandi and B. S. Yeo, Selective electrochemical reduction of carbon dioxide to ethylene and ethanol on copper (I) oxide catalysts, *ACS Catal.*, 2015, **5**, 2814.
- S8 J. Huang, M. Mensi, E. Oveisi, V. Mantella and R. Buonsanti, Structural Sensitivities in Bimetallic Catalysts for Electrochemical CO<sub>2</sub> Reduction Revealed by Ag-Cu Nanodimers. *J. Am. Chem. Soc.*, 2019, **141**, 2490.
- S9 D. Ren, B S H Ang and B S. Yeo, Tuning the selectivity of carbon dioxide electroreduction toward ethanol on oxide-derived Cu<sub>x</sub>Zn catalysts. *ACS Catal.*, 2016, **6**, 8239.
- S10 H. Mistry, Y. W. Choi, A. Bagger, F. Scholten, C. S. Bonifacio, I. Sinev, N. J. Divins, I. Zegkinoglou, H. S. Jeon, K. Kisslinger, E. A. Stach, J. C. Yang, J. Rossmeisl, B. Roldan Cuenya, Enhanced carbon dioxide electroreduction to carbon monoxide over defect-rich plasma-activated silver catalysts, *Angew. Chem. Int. Ed.*, 2017, **56**, 11394.
- S11 B. Qin, Y. Li, H. Fu, H. Wang, S. Chen, Z. Liu and F. Peng, Electrochemical reduction of CO<sub>2</sub> into tunable syngas production by regulating the crystal facets of earth-abundant Zn catalyst. *ACS. Appl. Mater. Inter.*, 2018, **10**, 20530.
